# Supplementary material for: Artificial Radionuclides in Squid from northwestern Pacific in 2011followingthe Fukushima accident
Source: Copernicus journal article supplement (doi:10.5194/bg-2018-133), 2018-05-08
Supplement: Supplementary file 1 [file bg-2018-133-supplement.pdf]

1 Table S1. Dose conversion coefficients (DCCs) of radionuclides for squid dose calculation.

| Radionuclides  | Internal                |                                        |          | External                |                                        |
|----------------|-------------------------|----------------------------------------|----------|-------------------------|----------------------------------------|
|                | $\beta$<br>( $<10$ keV) | $\beta$ ( $\geq 10$ keV)<br>& $\gamma$ | $\alpha$ | $\beta$<br>( $<10$ keV) | $\beta$ ( $\geq 10$ keV)<br>& $\gamma$ |
| <b>Ag-110m</b> | 0                       | 2.10E-04                               | 0        | 0                       | 1.40E-03                               |
| <b>Cs-134</b>  | 0                       | 1.90E-04                               | 0        | 0                       | 8.10E-04                               |
| <b>Cs-137</b>  | 0                       | 1.80E-04                               | 0        | 0                       | 2.90E-04                               |
| <b>U-238</b>   | 0                       | 0                                      | 2.40E-03 | 0                       | 1.30E-07                               |
| <b>Ra-226</b>  | 0                       | 7.00E-04                               | 1.33E-02 | 0                       | 9.40E-04                               |
| <b>Po-210</b>  | 0                       | 0                                      | 3.10E-03 | 0                       | 4.40E-09                               |

2

3

4 Table S2. Dose Conversion Factors are from ICRP Pub 119 for members of public (Sv Bq<sup>-1</sup>).

|                | ICRP DCF |
|----------------|----------|
| <b>K-40</b>    | 6.2E-09  |
| <b>Ag-110m</b> | 2.8E-09  |
| <b>Cs-134</b>  | 1.9E-08  |
| <b>Cs-137</b>  | 1.3E-08  |
| <b>Ra-226</b>  | 6.9E-07  |
| <b>U-238</b>   | 4.5E-08  |
| <b>Po-210</b>  | 1.2E-06  |

5

6
